# Supplementary material
Source: PubMed Central journal article supplement (PMC6125219)
Supplement: NIHMS972236-supplement-1.pdf [file NIHMS972236-supplement-1.pdf]

1 **Supplemental Figure legends**

2  
3 **Figure S1.** Schematic of the PDO generation and analysis pipeline.

4  
5 **Figure S2. A.** CNA by chromosome using whole exome (top panel) and whole genome sequencing  
6 (bottom panel, hT117). **B.** Indels per megabase (MB) in the human organoids. Line represents the mean  
7 and error bars the standard deviation. hF43 is highlighted in orange. **C.** Genomic alterations evaluated by  
8 whole genome sequencing following germline correction of the PDO library. **D.** CNA by gene evaluated by  
9 whole genome sequencing following germline correction.

10  
11 **Figure S3.** Circos plots from germline corrected WGS of matched primary and hT organoid specimens as  
12 well as biopsy derived hF PDO cultures. TvN: Primary tumor specimen following germline correction to  
13 normal tissue. OvN: PDO following germline correction to normal tissue.

14  
15 **Figure S4. A.** NMF cluster ranking of clustering of the 2,000 most variably expressed genes. **B.** NMF  
16 cluster performance.

17  
18 **Figure S5.** Chemotherapy dose response curves of representative PDO cultures evaluated at different  
19 passage numbers.

20  
21 **Figure S6. A.** Progression free survival of advanced patients following diagnosis and isolation of a PDO.  
22 Historical median progression free survival is indicated by a dotted line (180 days). The chemotherapeutic  
23 regimen received by the patient is indicated in parenthesis and color coded for PDO pharmacotyping AUC  
24 results: blue denotes a sensitive drug, grey denotes an intermediate drug and red denotes a resistant drug.  
25 **B.** The response of hF2 to chemotherapy among the distribution of all PDO AUC responses. **C.** Patient MR  
26 scans at the time of organoid isolation and following two different regimens of chemotherapy. The  
27 chemotherapeutic regimen received by the patient is indicated and color coded for PDO cohort normalized  
28 AUC results: blue is top 33% sensitive organoids, red is the top 34% of resistant organoids.

29  
30 **Figure S7. A.** Normalized AUC values from targeted therapy pharmacotyping. **B.** Mutation and CNA in the  
31 homologous repair deficiency pathway following germline correction of PDO organoid whole genome  
32 sequencing data.

33  
34 **Figure S8.** Schematic representation of PDO-pharmacotranscriptomic signature workflow on a per drug  
35 basis.

36  
37 **Figure S9.** The Spearman's correlation value for each gene within one drug-specific signature are shown  
38 as violin plots for Gemcitabine (**A**), Paclitaxel (**B**), SN-38 (**C**), 5-FU (**D**) and Oxaliplatin (**E**).

39  
40 **Figure S10. A.** The Spearman's correlation between gene expression and individual chemotherapy  
41 response signatures for Gemcitabine, Paclitaxel, SN-38, 5-FU, and Oxaliplatin. Only genes whose  
42 expression increased with decreased AUC are shown (negative rho). Low AUC is indicative of increased  
43 sensitivity. **B.** Clustering of PDO cultures using the individual Paclitaxel, SN-38, 5-FU, and Oxaliplatin  
44 chemotherapy sensitivity signatures with the associated PDO pharmacotyping results (log<sub>2</sub> transformed z-  
45 scores).

46  
47 **Figure S11. A.** The Gemcitabine sensitivity signature was applied to RNA-seq data from patients receiving  
48 Gemcitabine as a single agent or in combination with other chemotherapy. Additional data regarding the  
49 C1/C2 subtype, Basal/Classical subtype, and stage are shown. **B.** The OS of patients receiving only  
50 gemcitabine as a single agent and identified by the Gemcitabine sensitivity signature. **C-D.** The PFS (**C**)  
51 and OS (**D**) of patients identified as Gemcitabine Sensitive or Non-Sensitive as described in **A**. **E.** The  
52 Gemcitabine sensitivity signature was applied to RNA-seq data from untreated patients. Additional data  
53 regarding the C1/C2 subtype, Basal/Classical subtype, and stage are shown. **F.** The OS of patients  
54 identified as described in **E**. Log-rank (Mantel-Cox) test P values are shown.

56 **Figure S12.** The PDO-derived Gemcitabine **(A)**, Paclitaxel **(B)**, 5-FU **(C)** and SN-38 **(D)** signatures were  
57 used to cluster the COMPASS RNA-seq data (n=73).

58

59 **Figure S13.** Waterfall plot of the percent tumor response in the target lesion at 8 weeks for the patients  
60 receiving Gemcitabine and nab-Paclitaxel. Sensitivity to Gemcitabine and Paclitaxel is indicated. Additional  
61 data regarding the mean chemotherapeutic signature scores, C1/C2 subtype, and Basal/Classical subtype  
62 are shown.
