# Supplementary material
Source: PubMed Central journal article supplement (PMC6125219)
Supplement: NIHMS972236-supplement-2.pdf [file NIHMS972236-supplement-2.pdf]

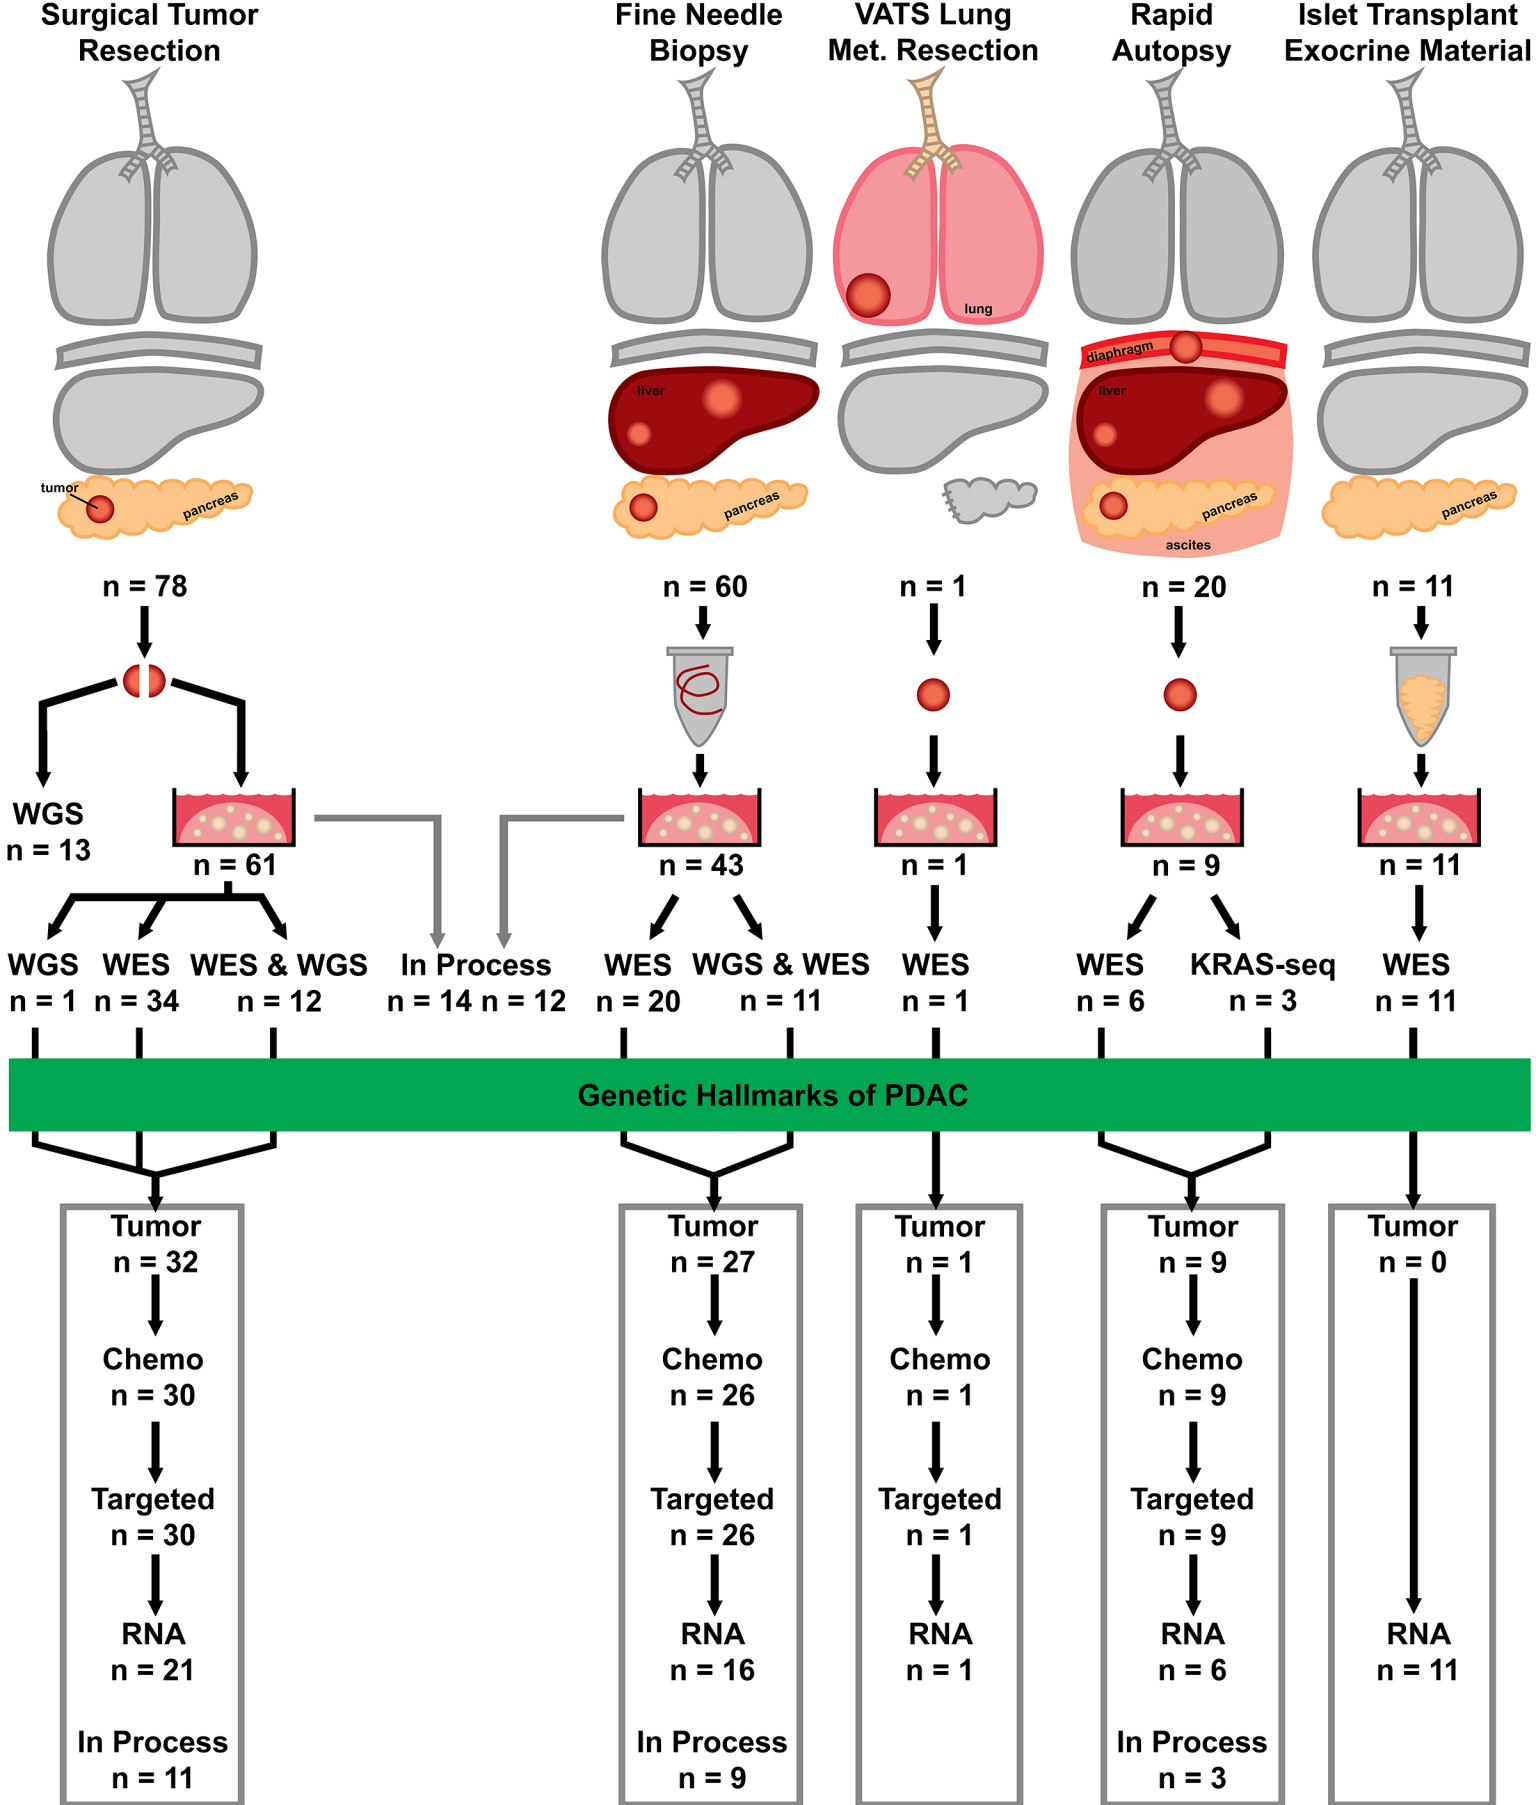

**Figure S1**

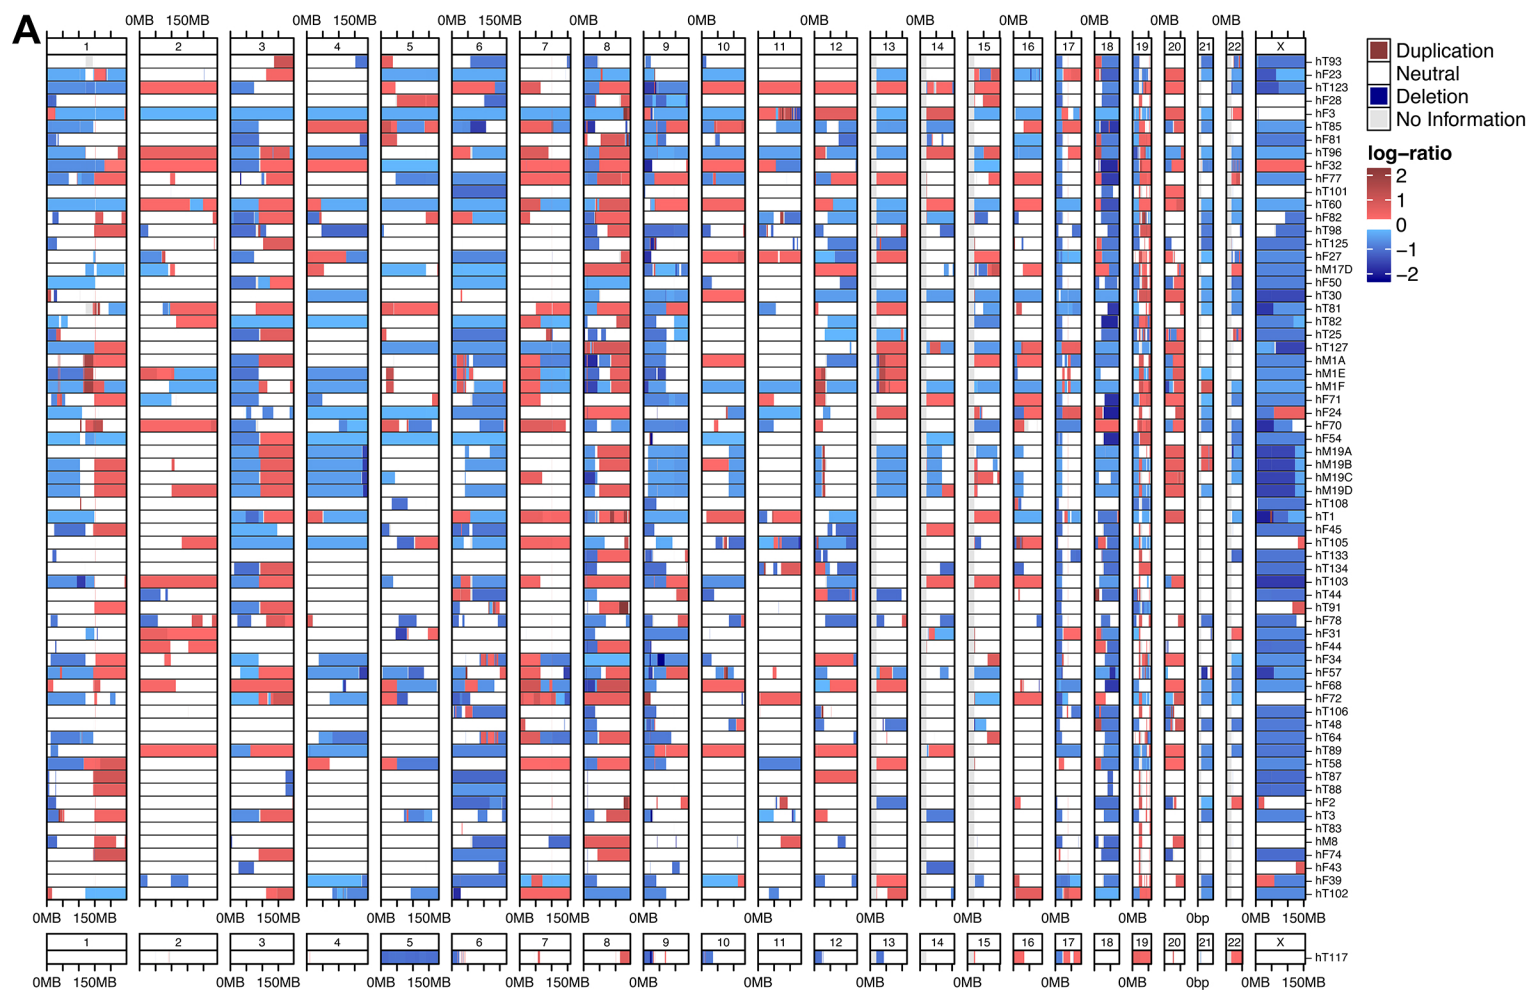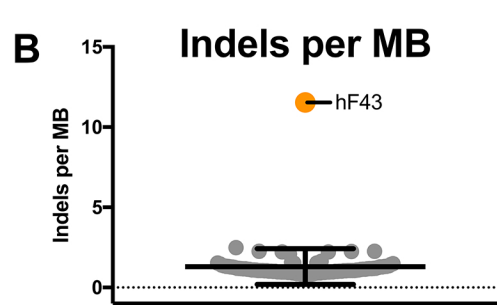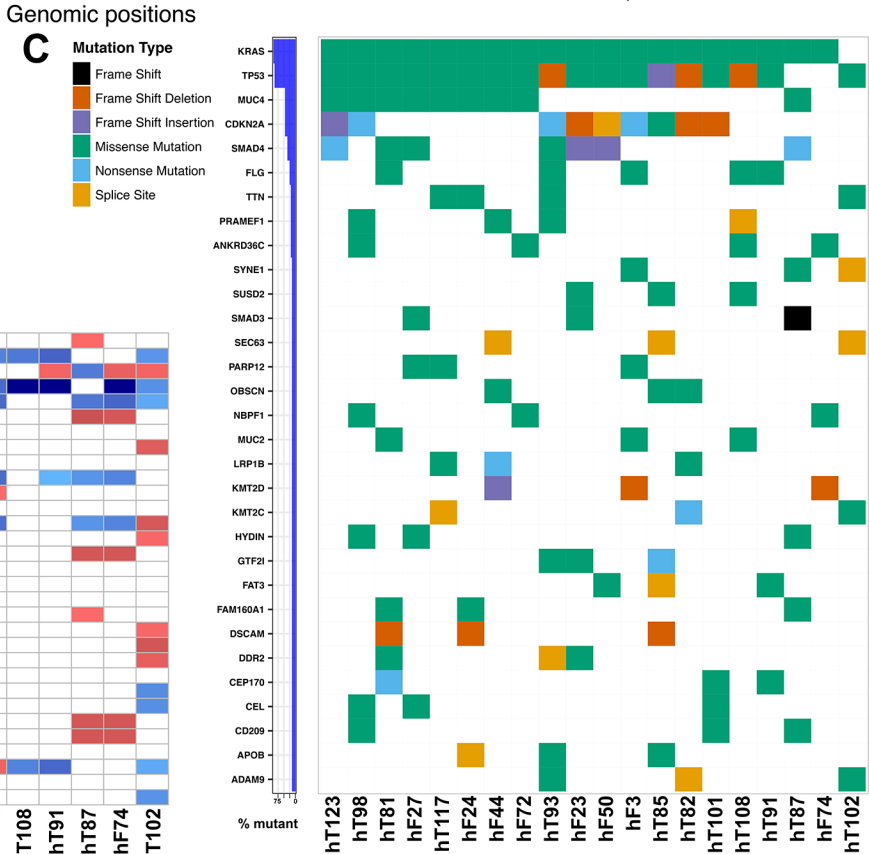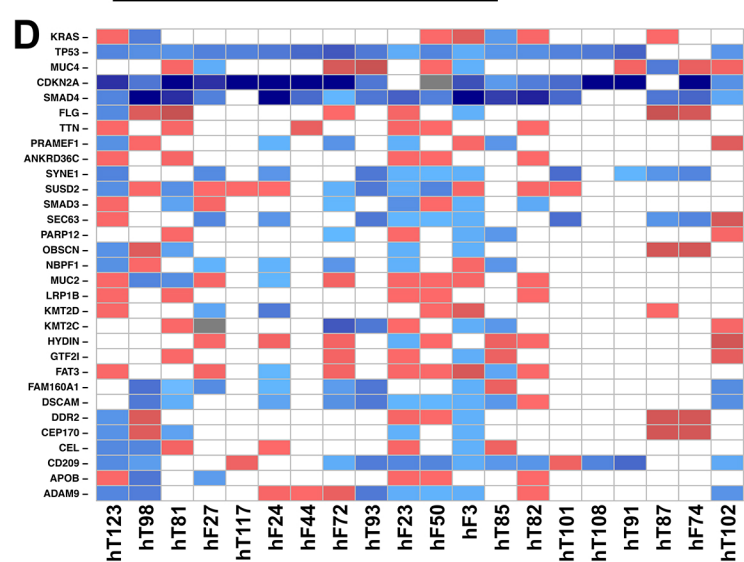

**Figure S2**

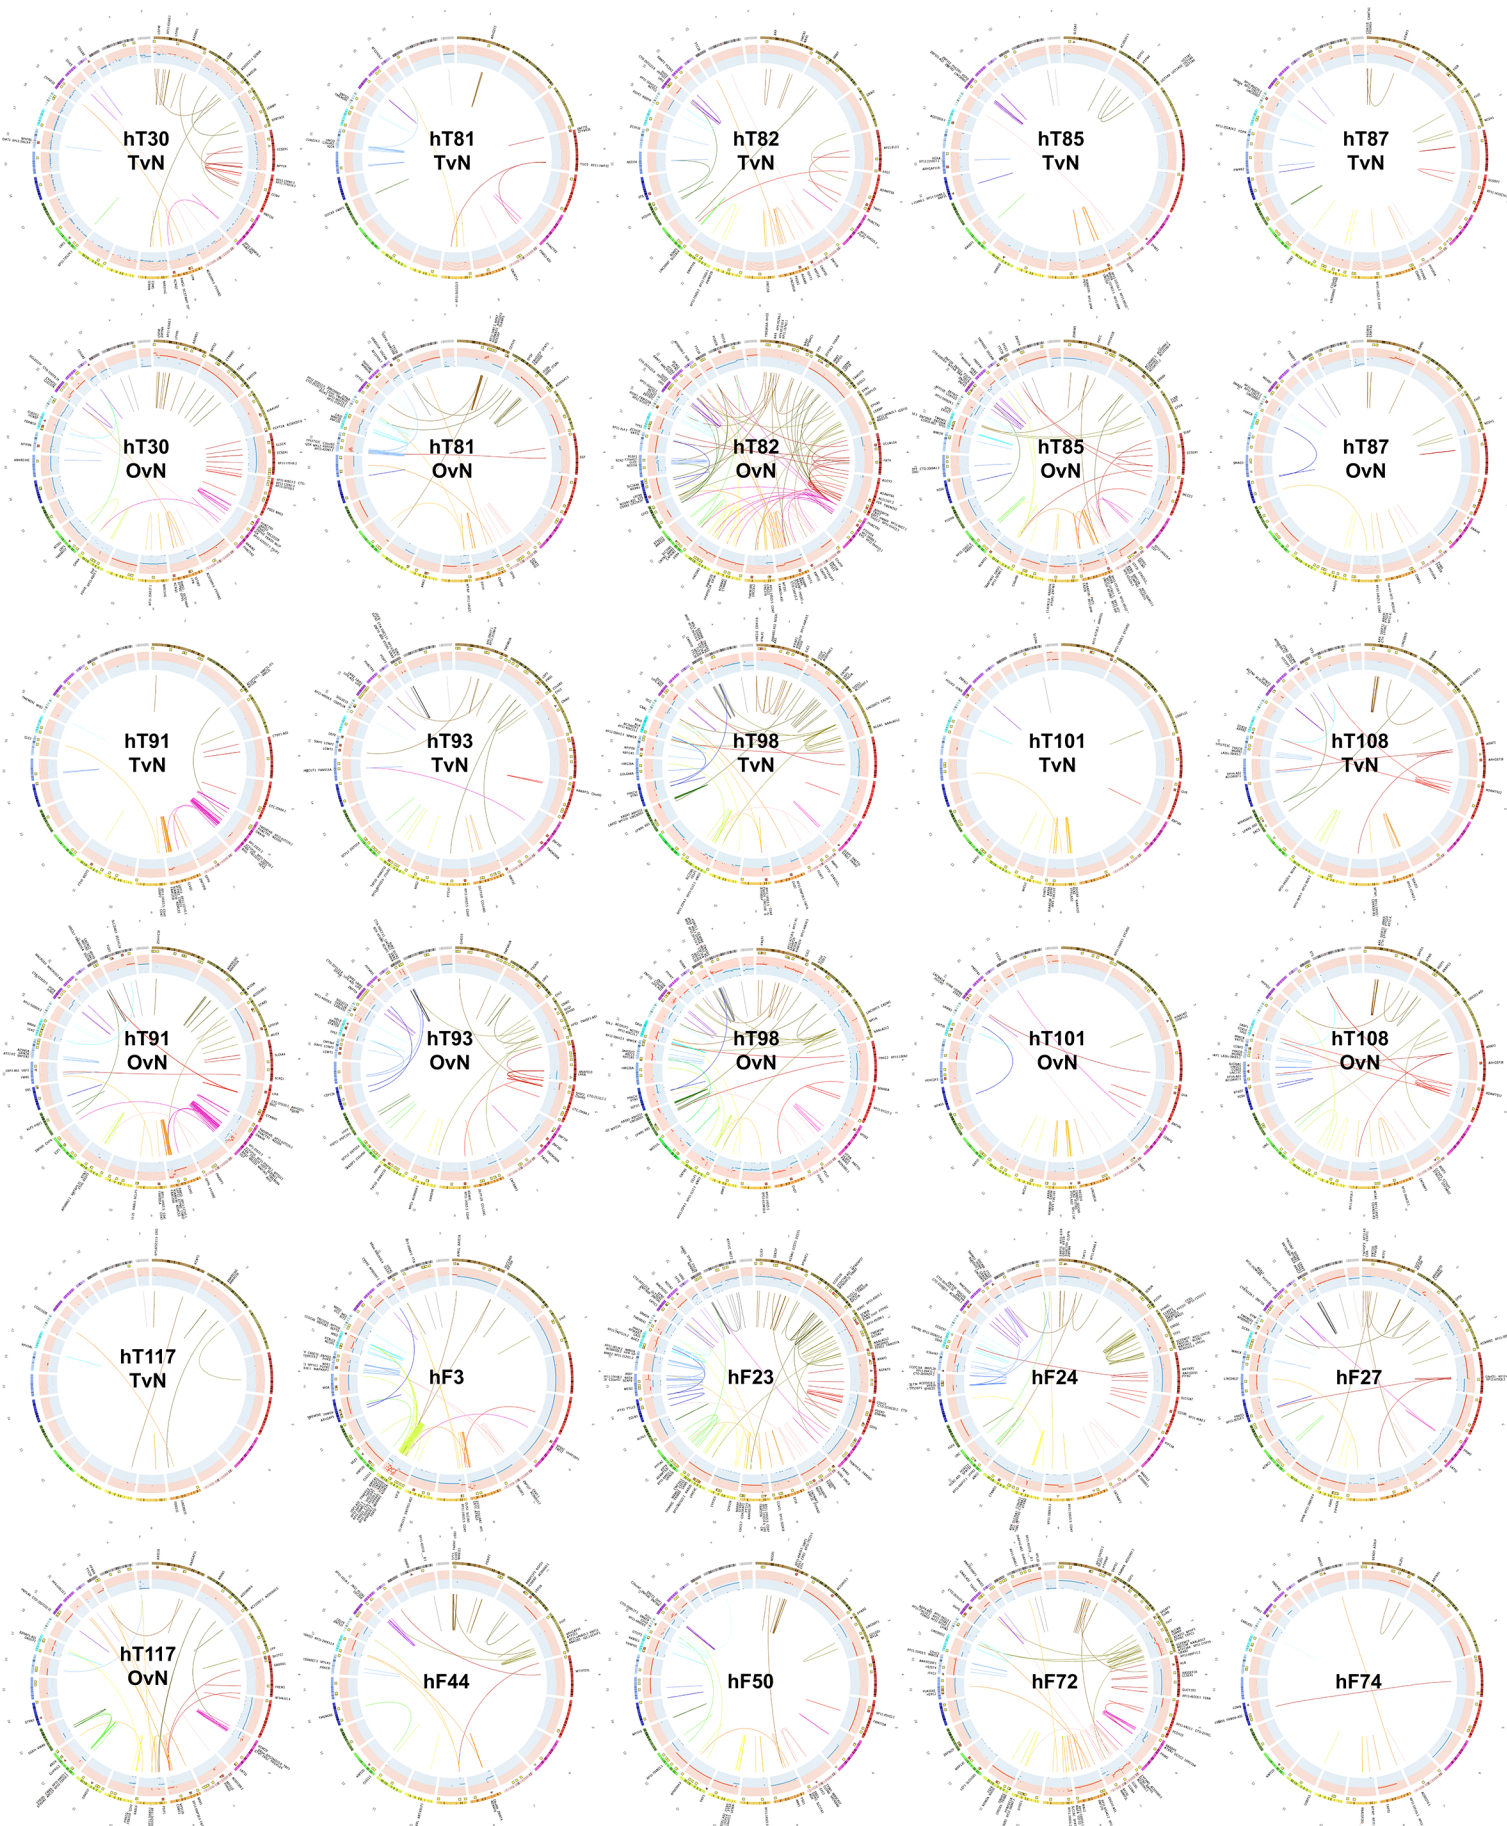

**Figure S3**



**A**

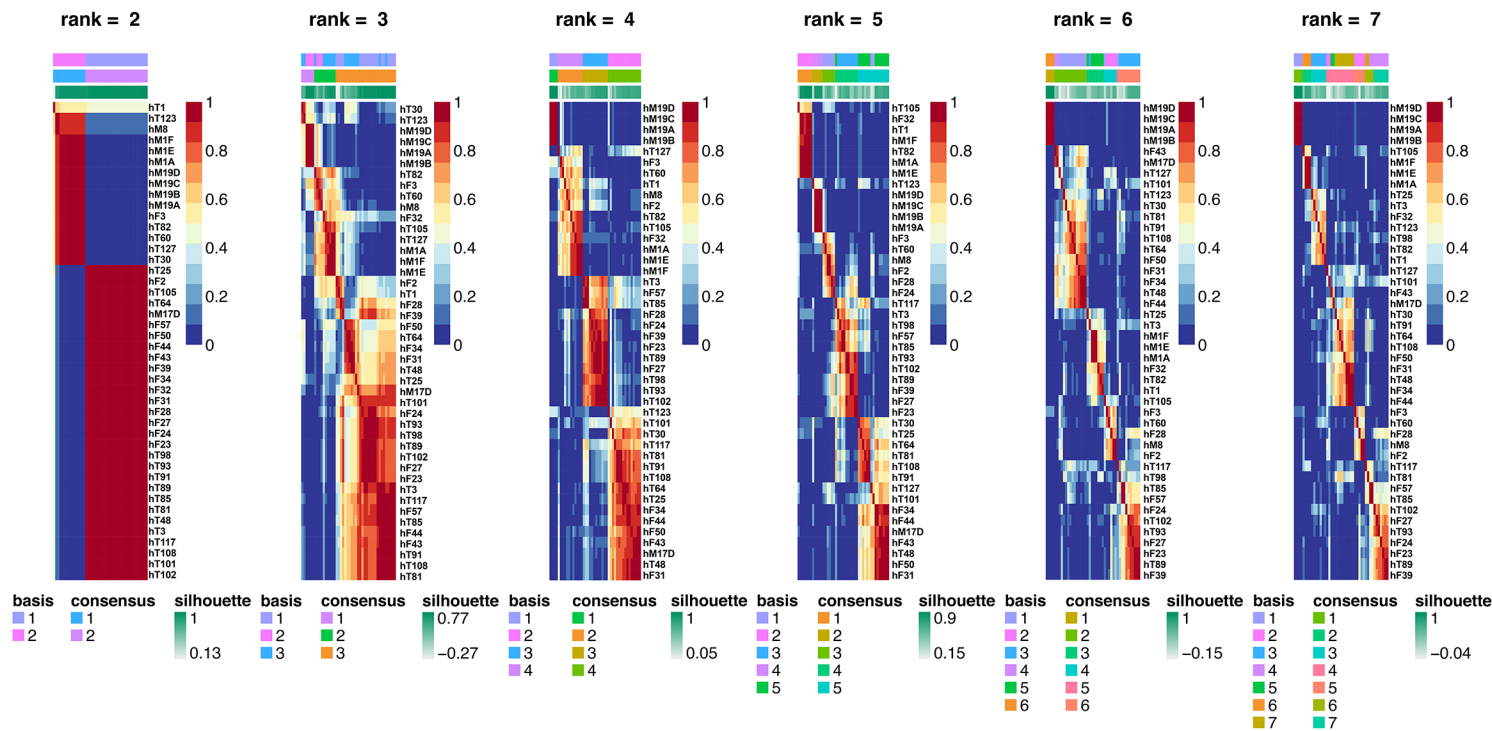

**B**

NMF rank survey

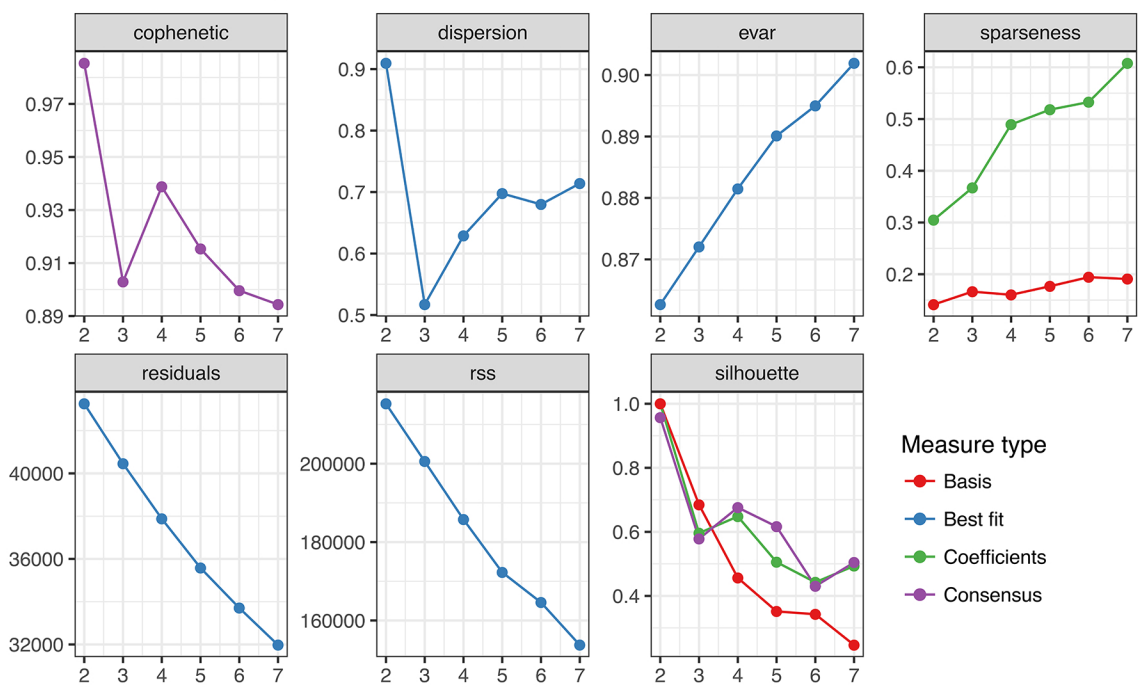

Figure S4



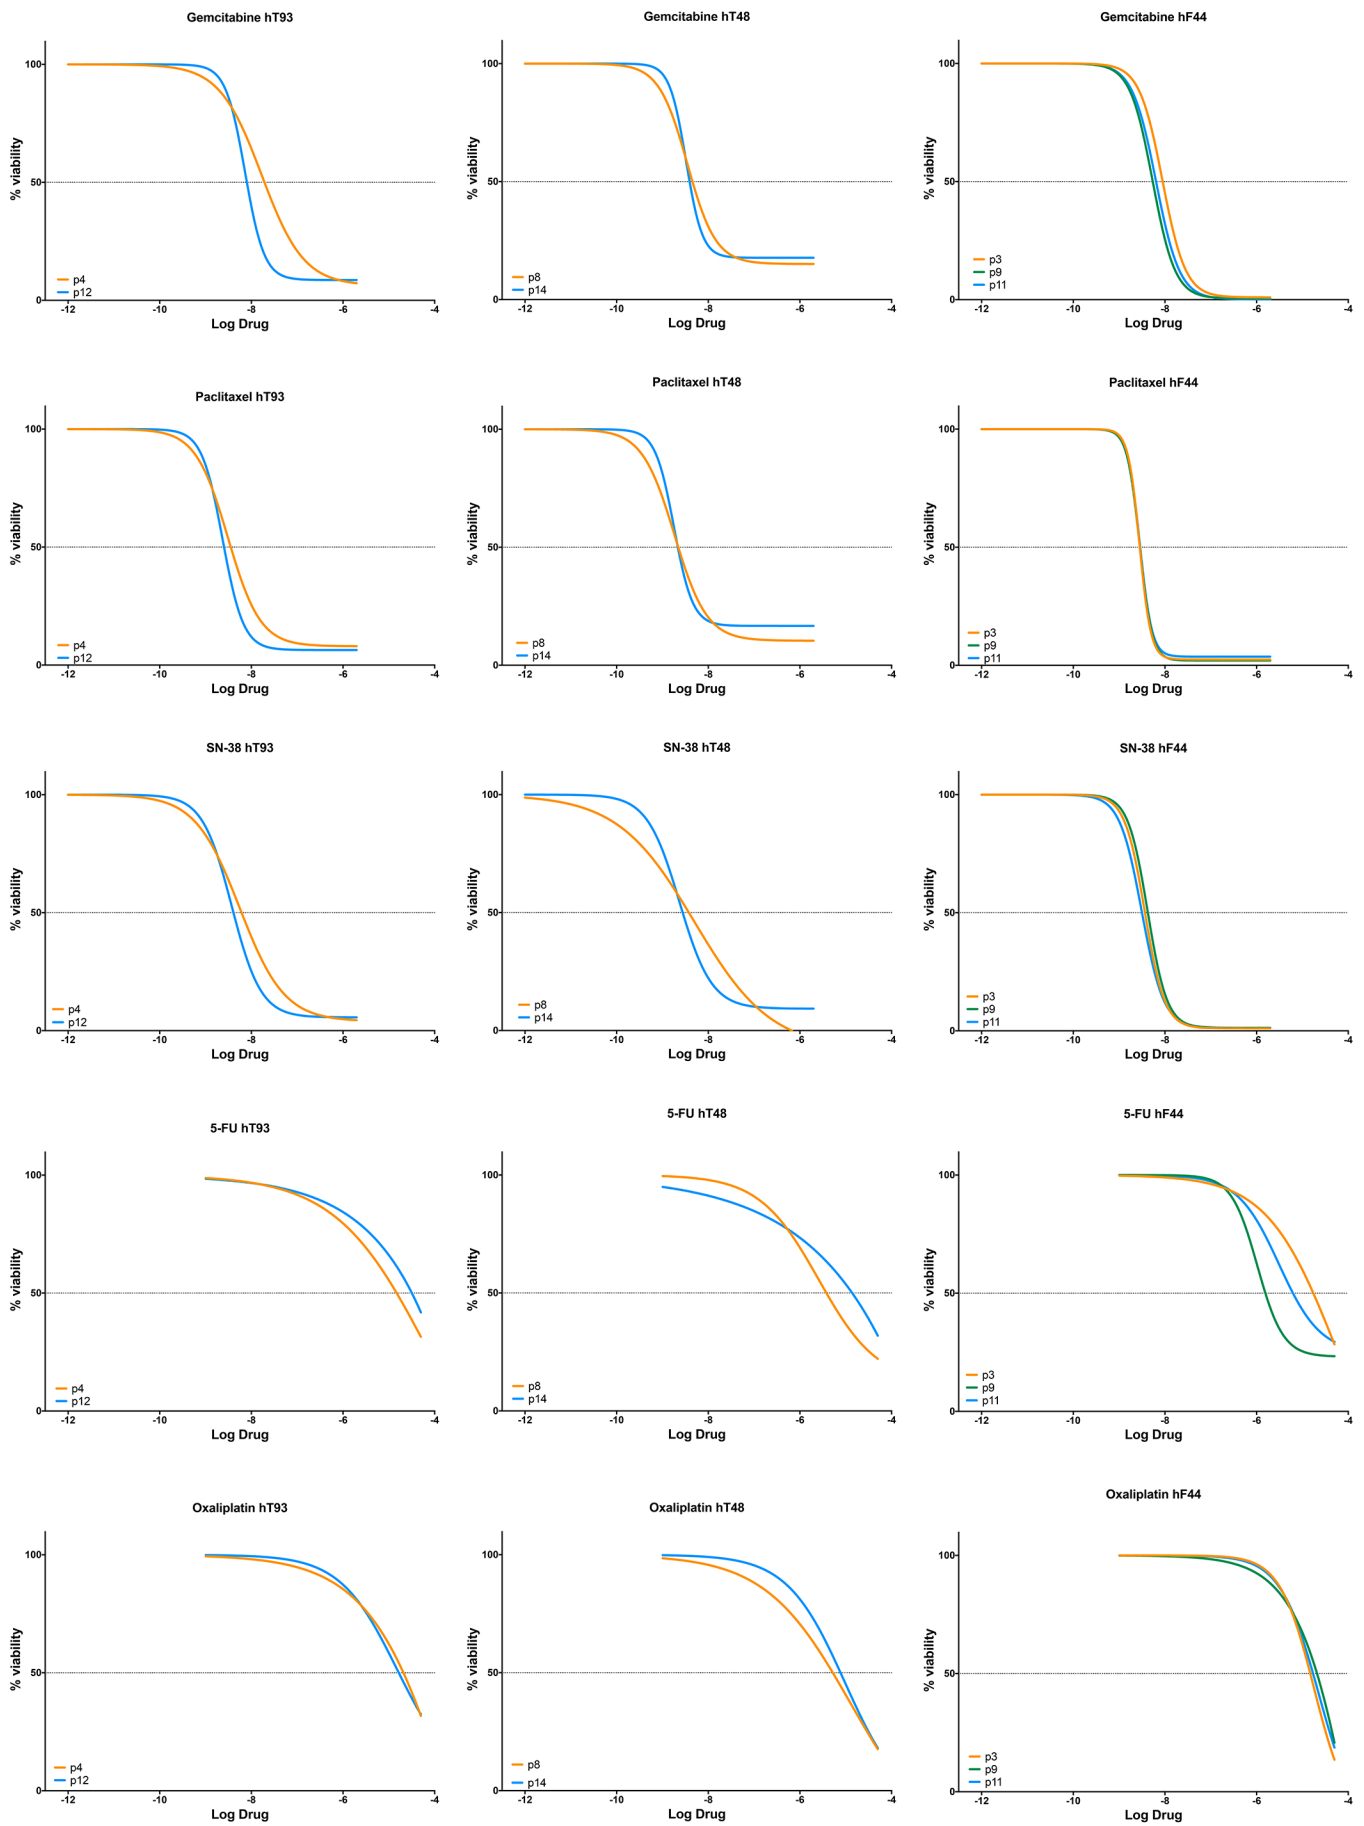

**Figure S5**

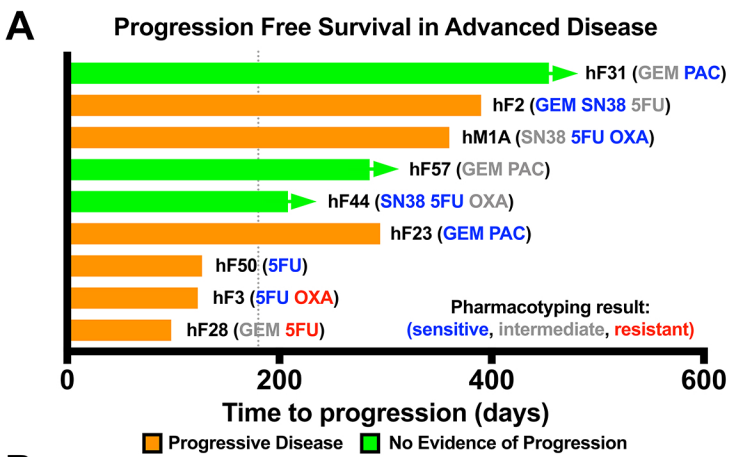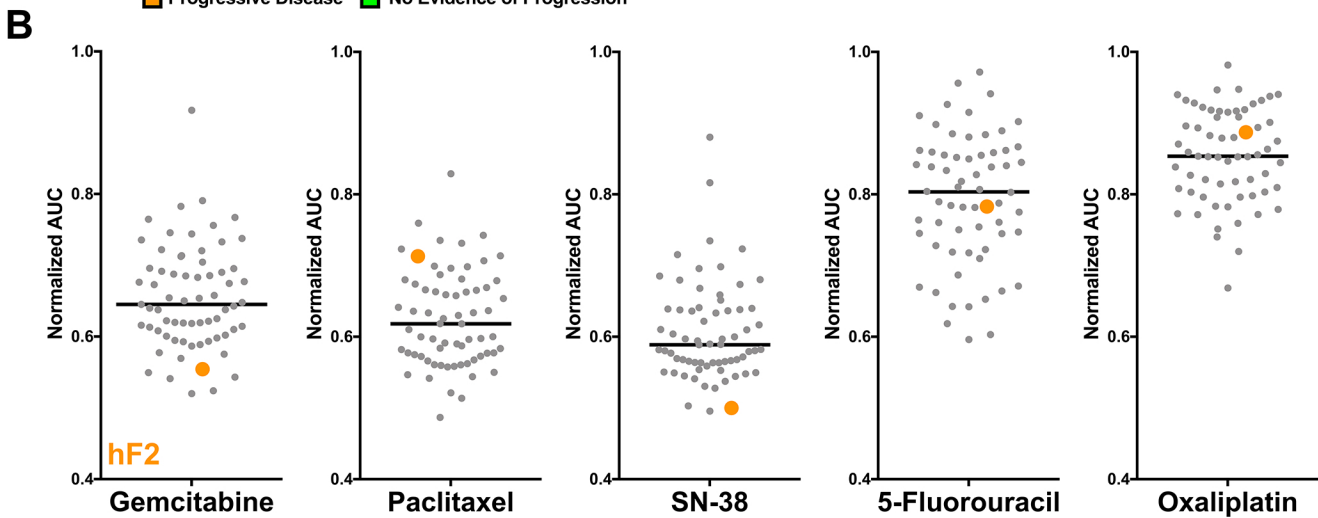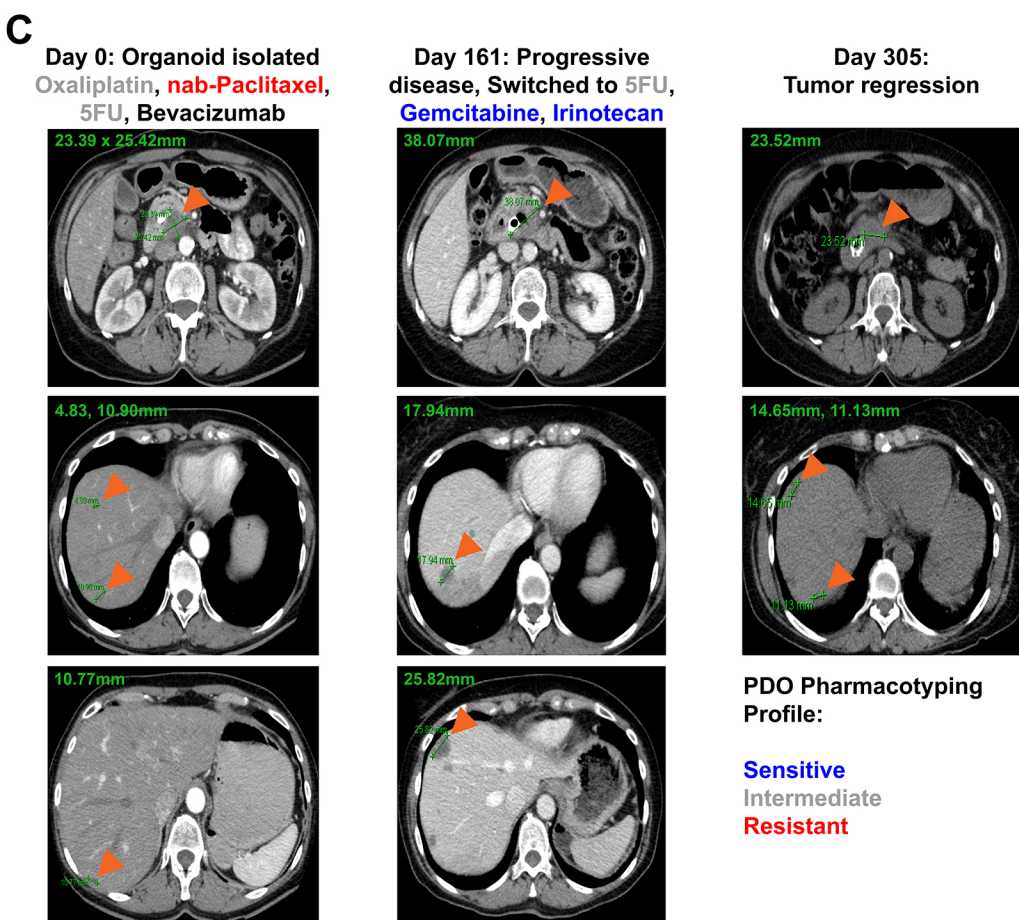

Figure S6

**A**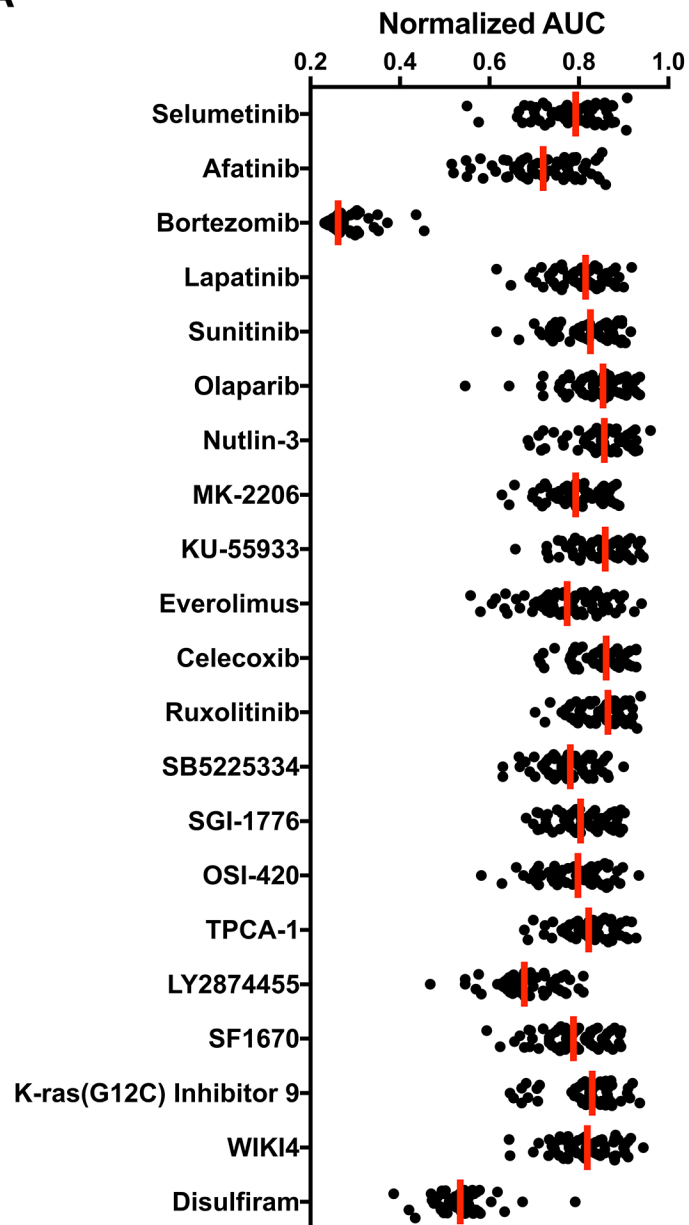**B**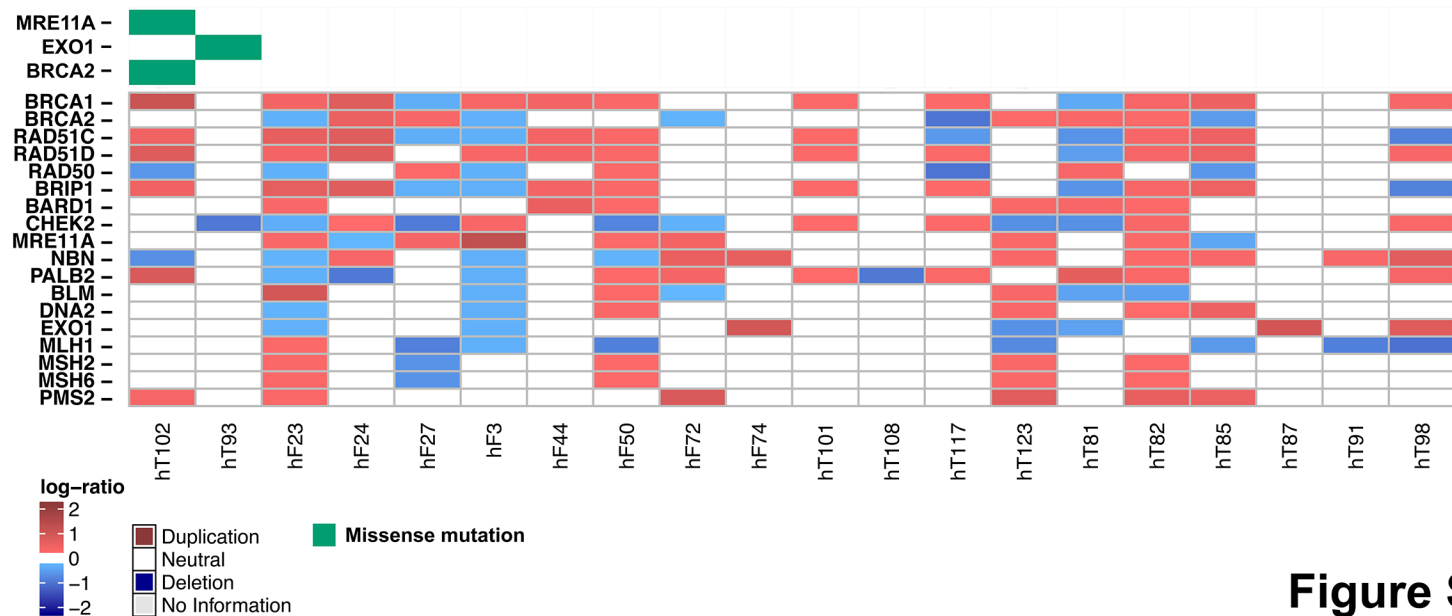**Figure S7**



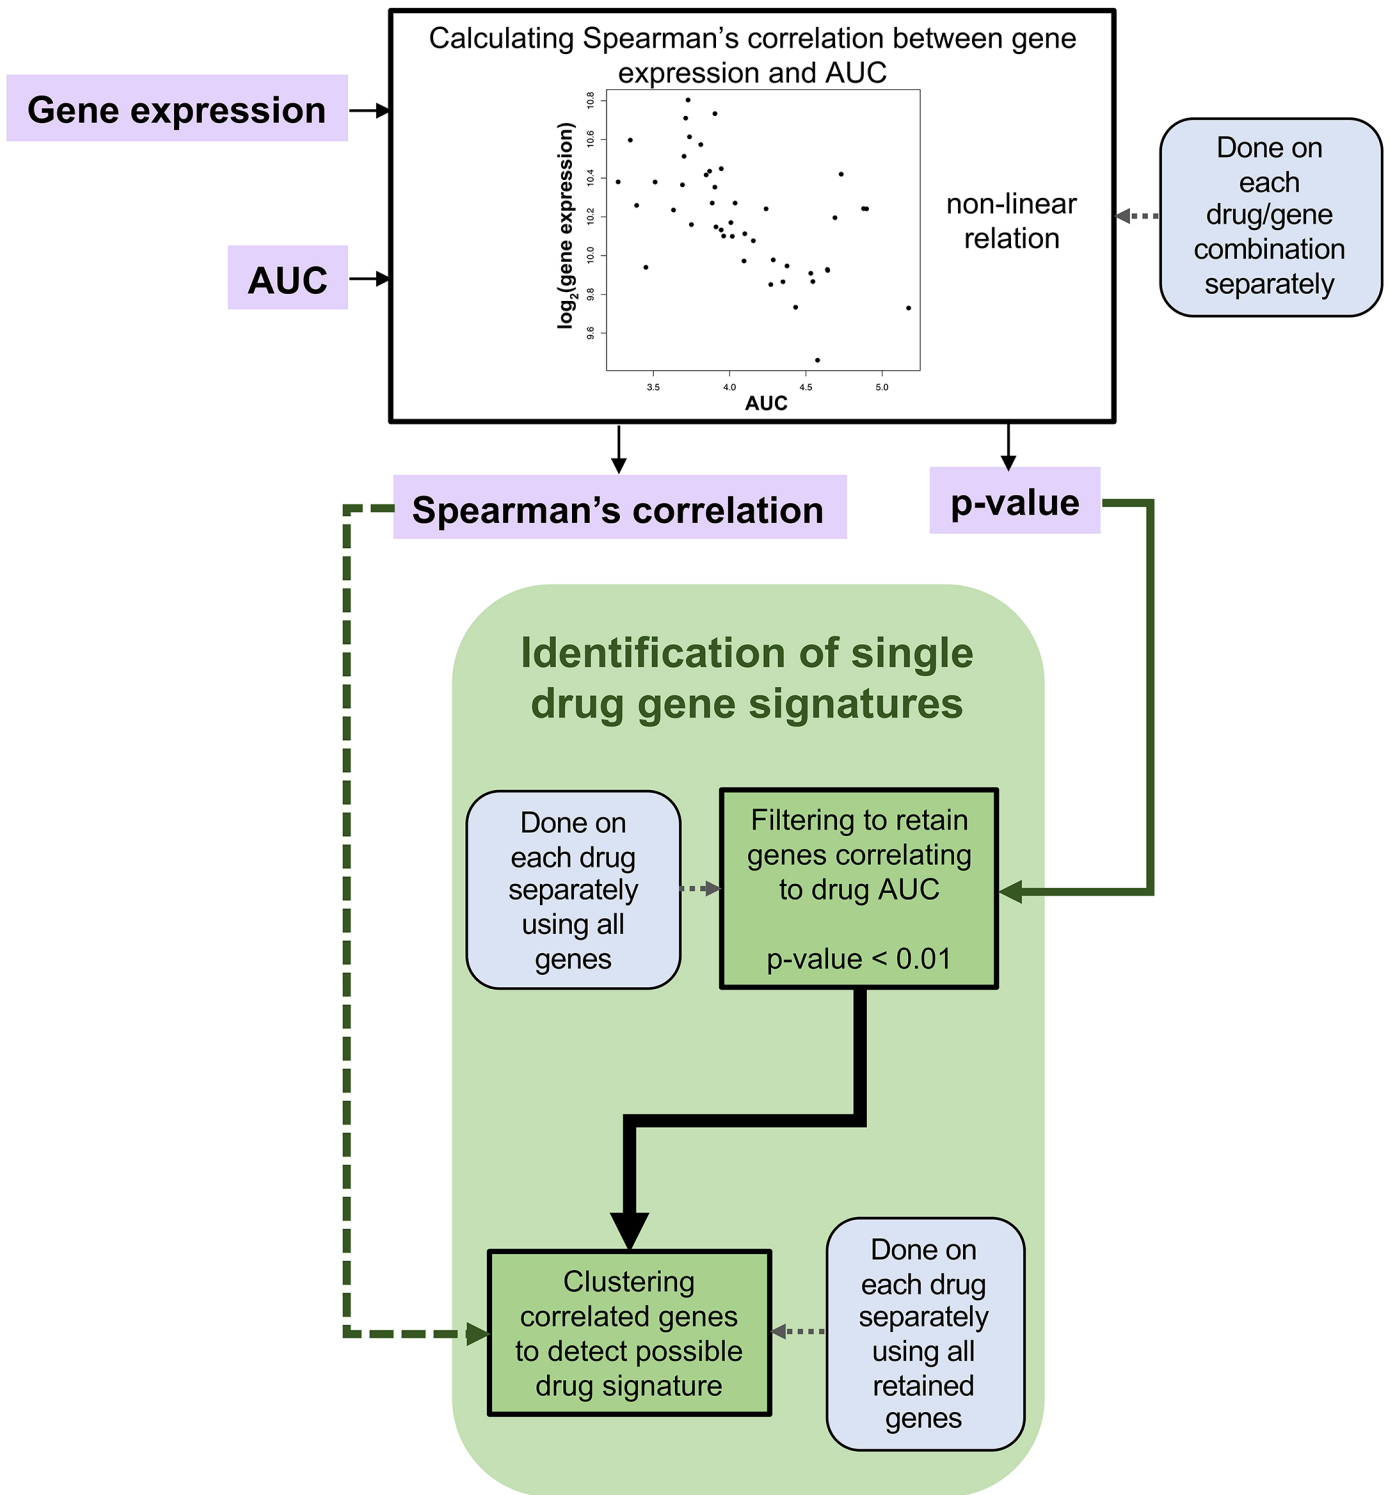

**Figure S8**

**A**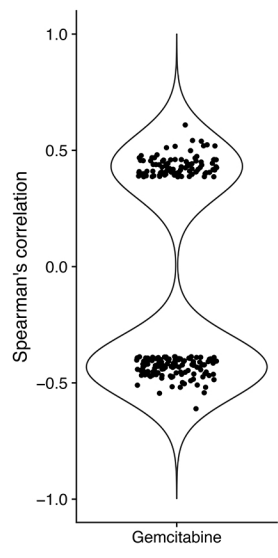**B**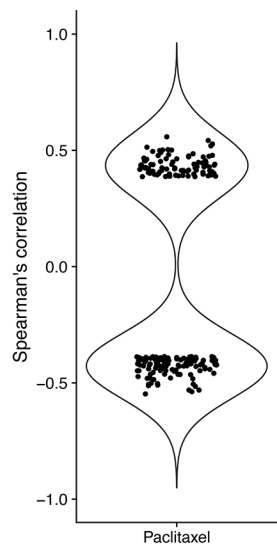**C**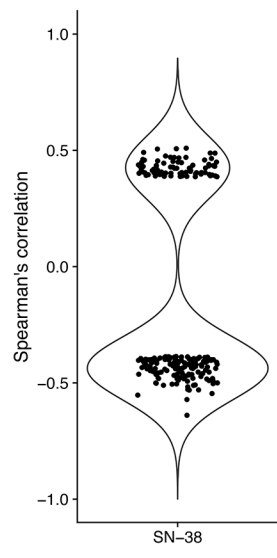**D**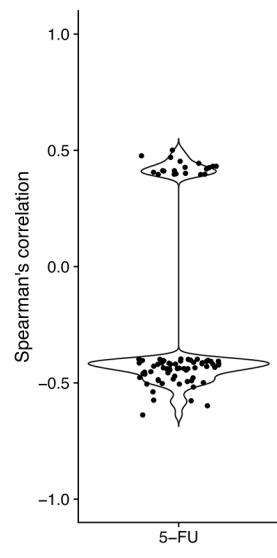**E**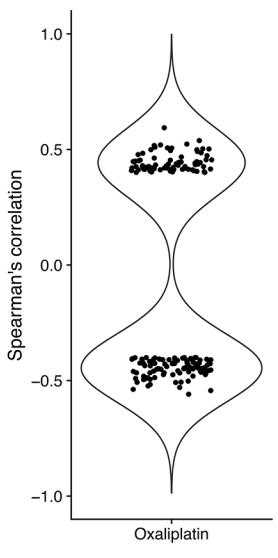**Figure S9**

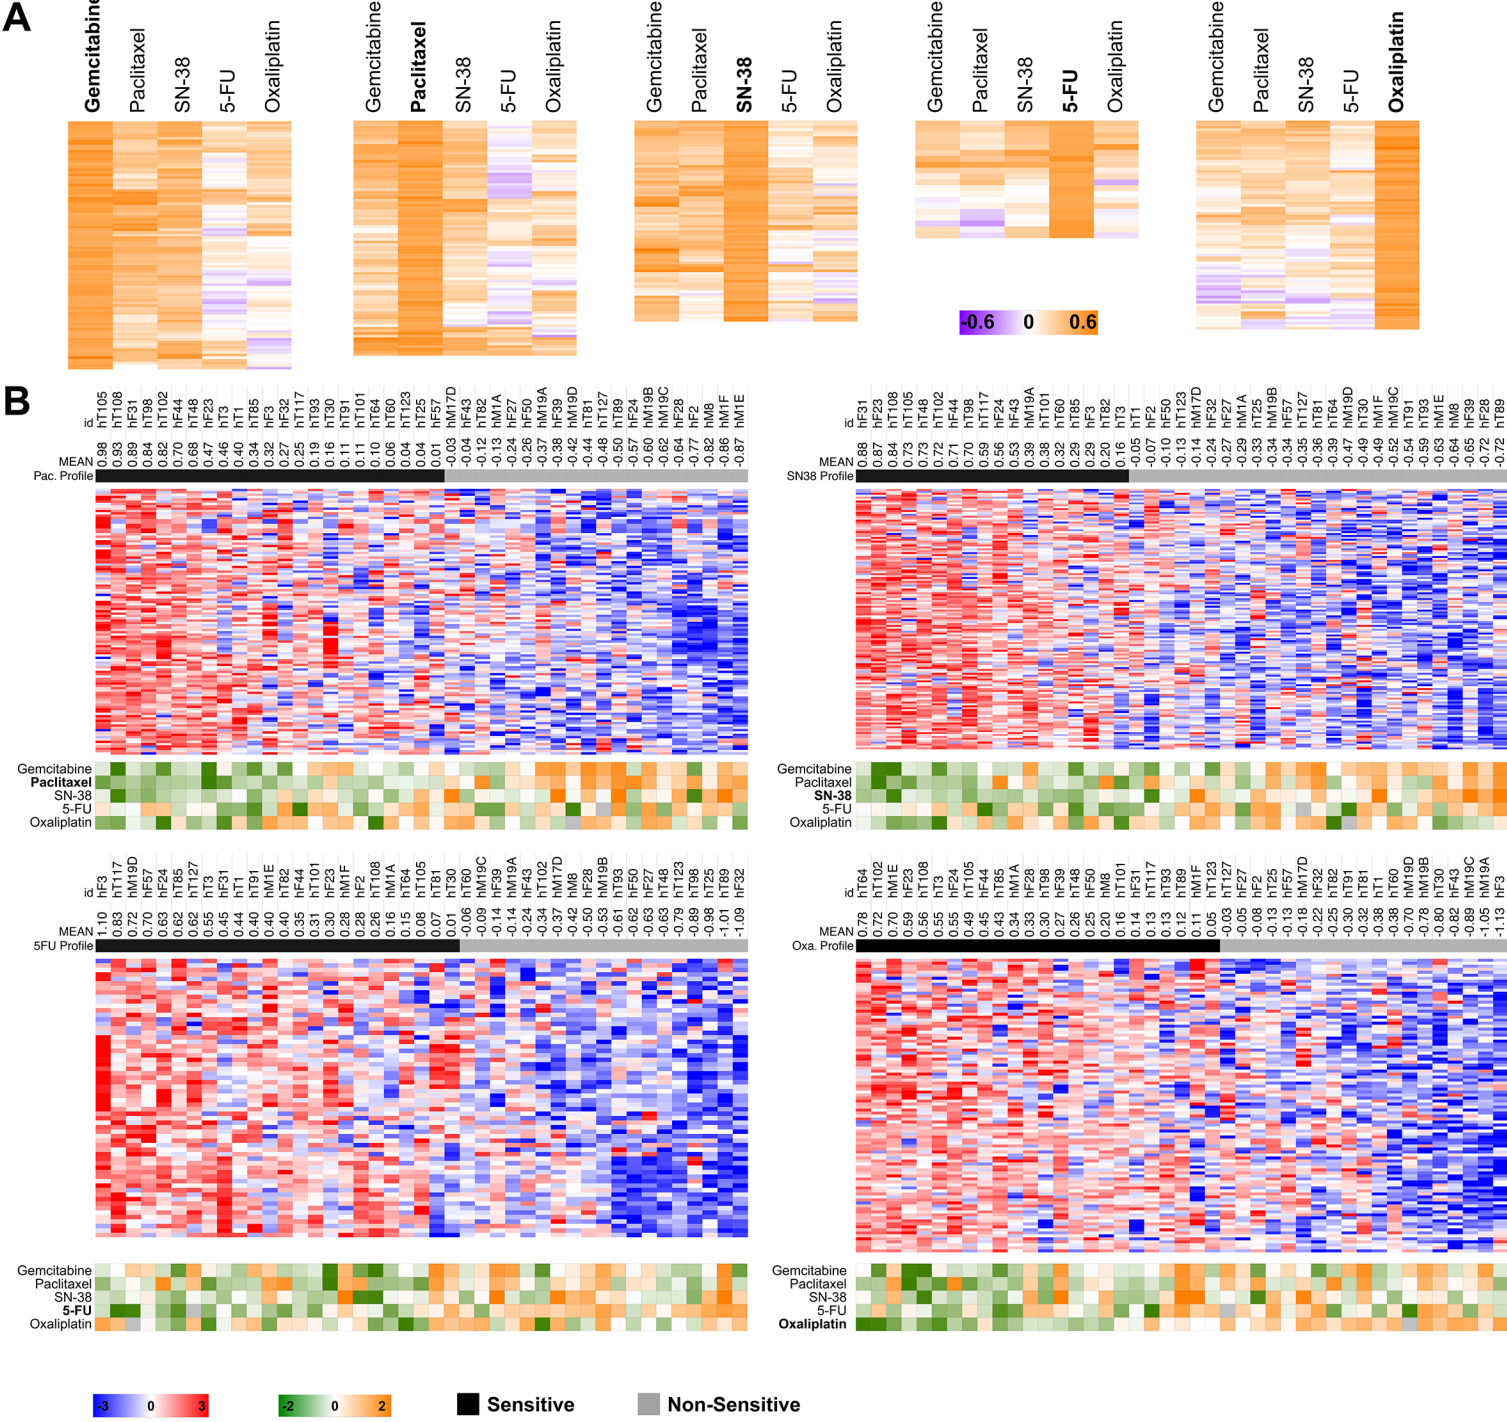

Figure S10



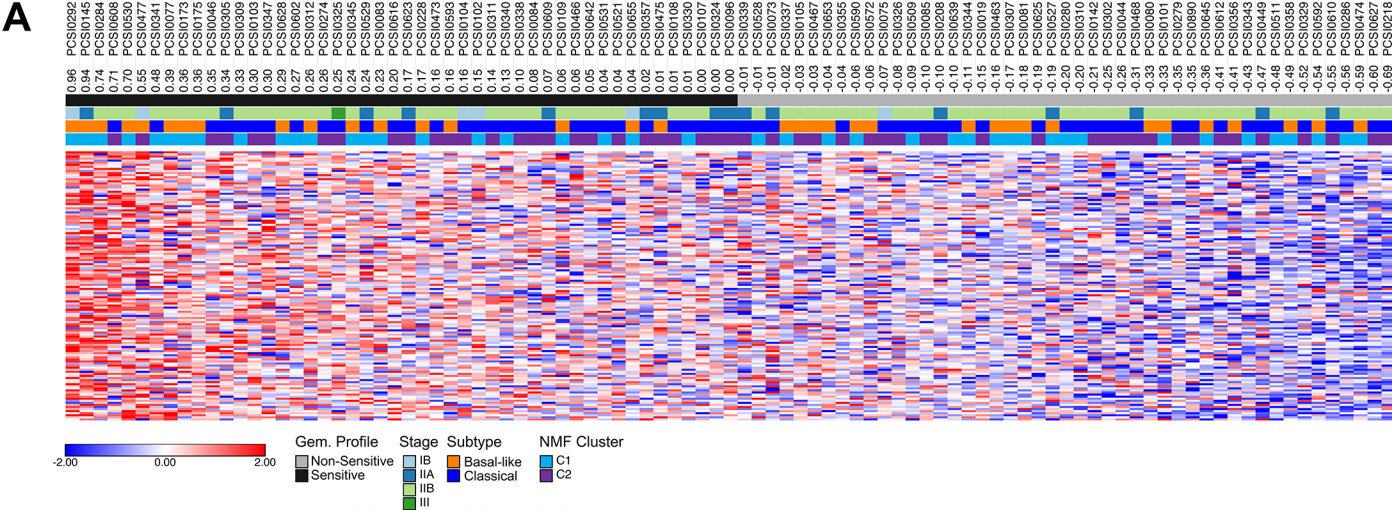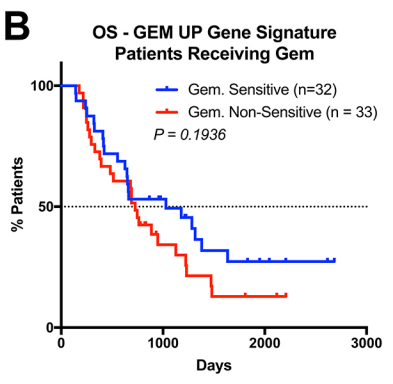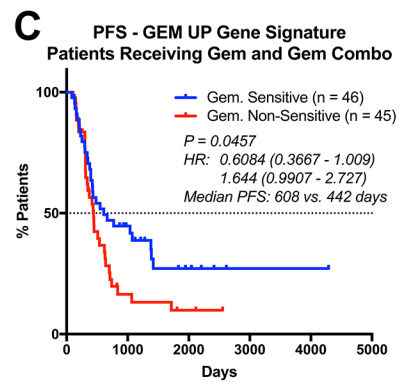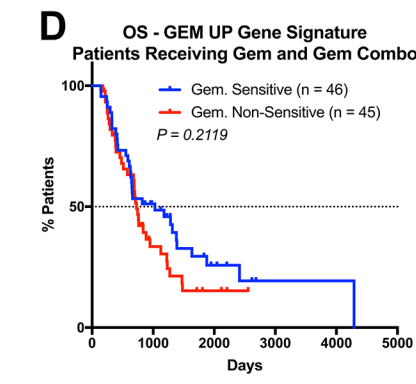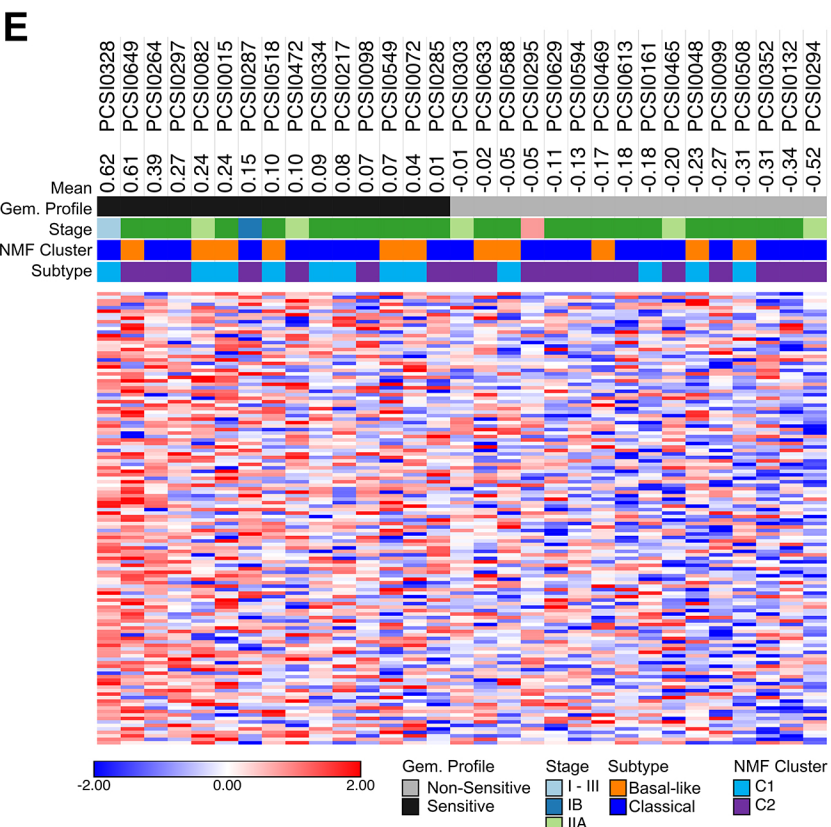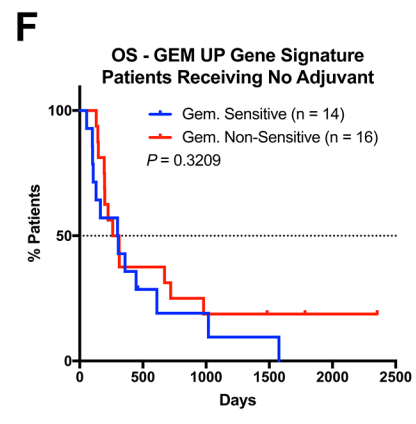

Figure S11



# GA COMPASS Cohort

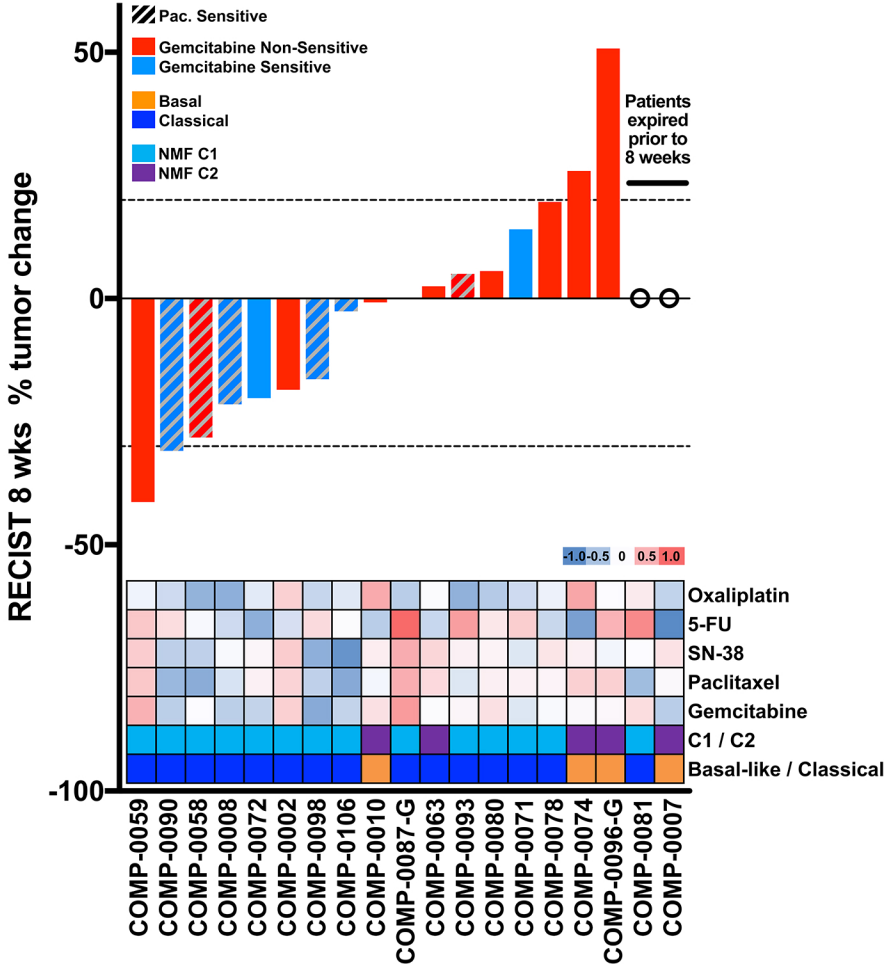

Figure S13
